# Supplementary material for: Lanthanide metal–organic frameworks based on a 1,2,3-triazole-containing tricarboxylic acid ligand for luminescence sensing of metal ions and nitroaromatic compounds
Source: Royal Society of Chemistry journal article supplement (doi:10.1039/c6ra06303a), 2016-01-01
Supplement: c6ra06303a1.pdf [file c6ra06303a1.pdf]

## Supporting Information

### **Lanthanide metal–organic frameworks based on a 1,2,3-triazole-containing tricarboxylic acid ligand for luminescence sensing of metal ions and nitroaromatic compounds**

Di Wang, Libo Sun, Chuanqing Hao, Yan Yan and Zhiqiang Liang\*

*State Key Laboratory of Inorganic Synthesis and Preparative Chemistry, College of  
Chemistry, Jilin University, Changchun 130012, P. R. China*

*E-mail: liangzq@jlu.edu.cn*

*Fax: +86-431-85168609*

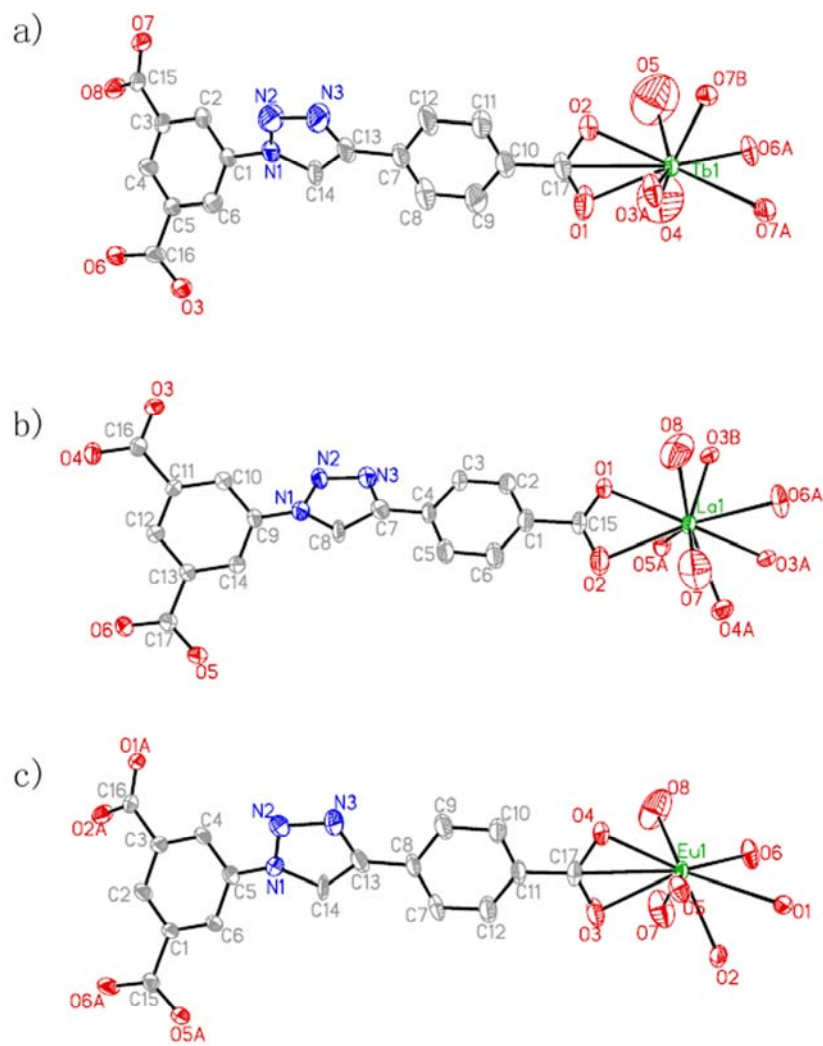

**Fig. S1** Representation of the asymmetric unit of **1** (a), **2** (b) and **3** (c) showing ellipsoid at the 50% probability level.

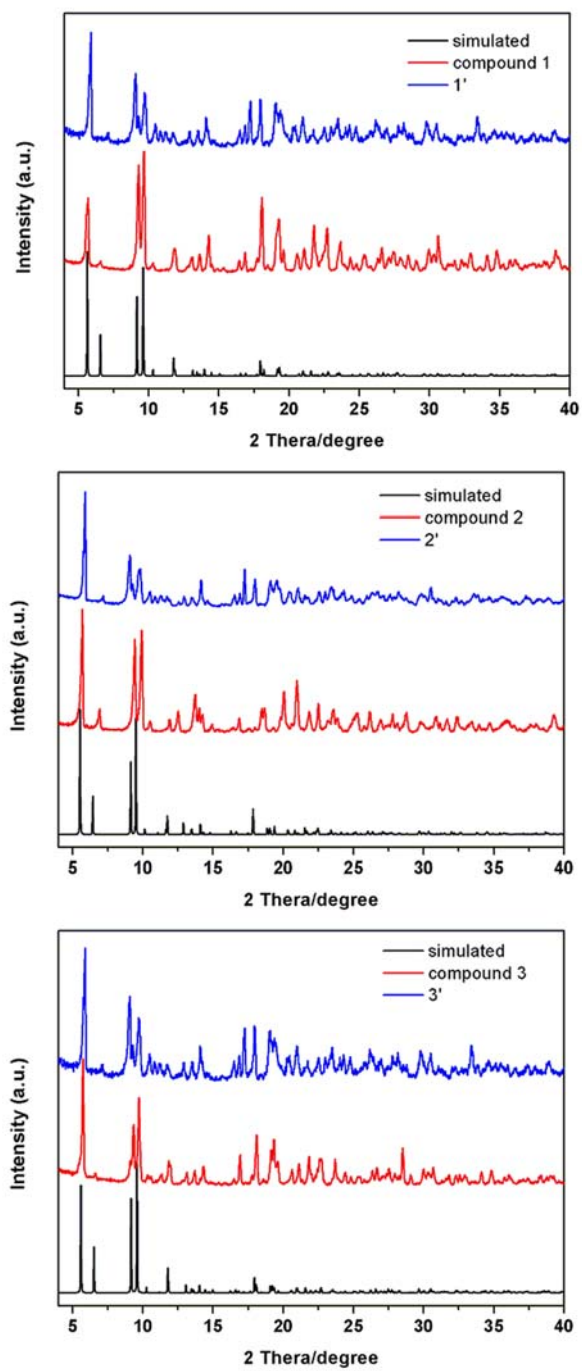

**Fig. S2** Powder X-ray diffraction patterns of compounds **1–3** and micrometer-sized **1'–3'**.

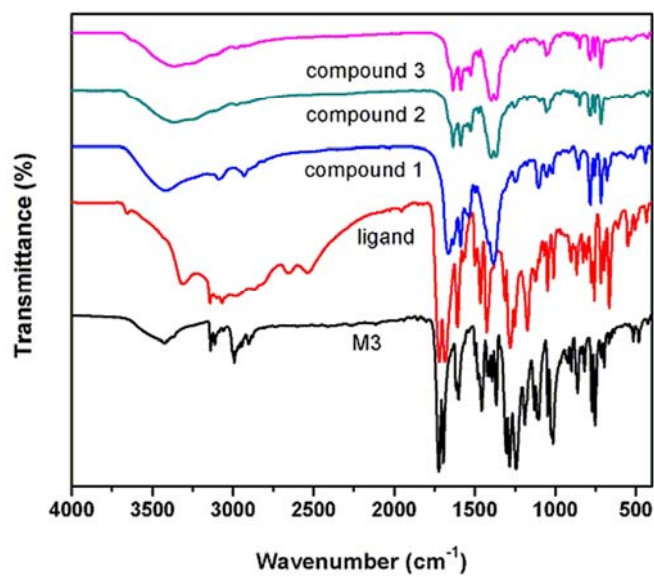

**Fig. S3** Infra-red spectra of M3, ligand and compounds 1-3.

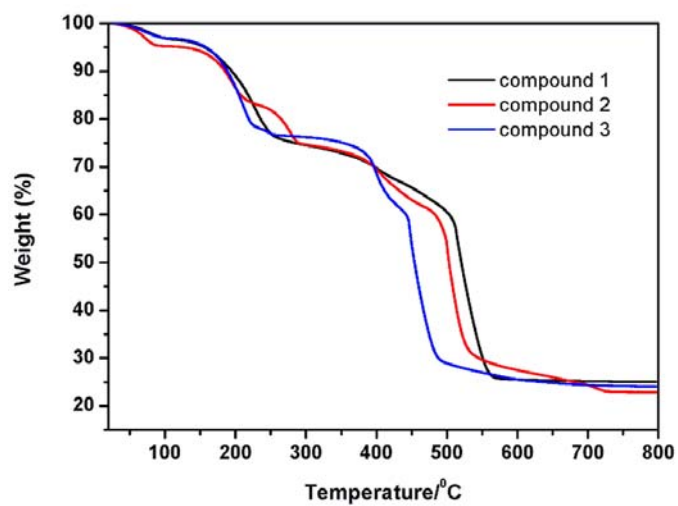

**Fig. S4** TGA curves of compounds 1-3.

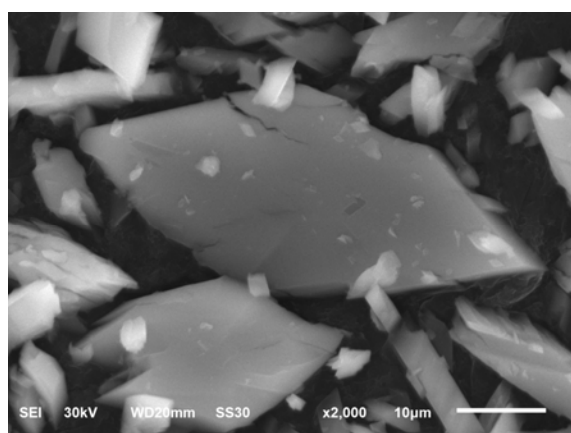

**Fig. S5** SEM image of micrometer 1'.

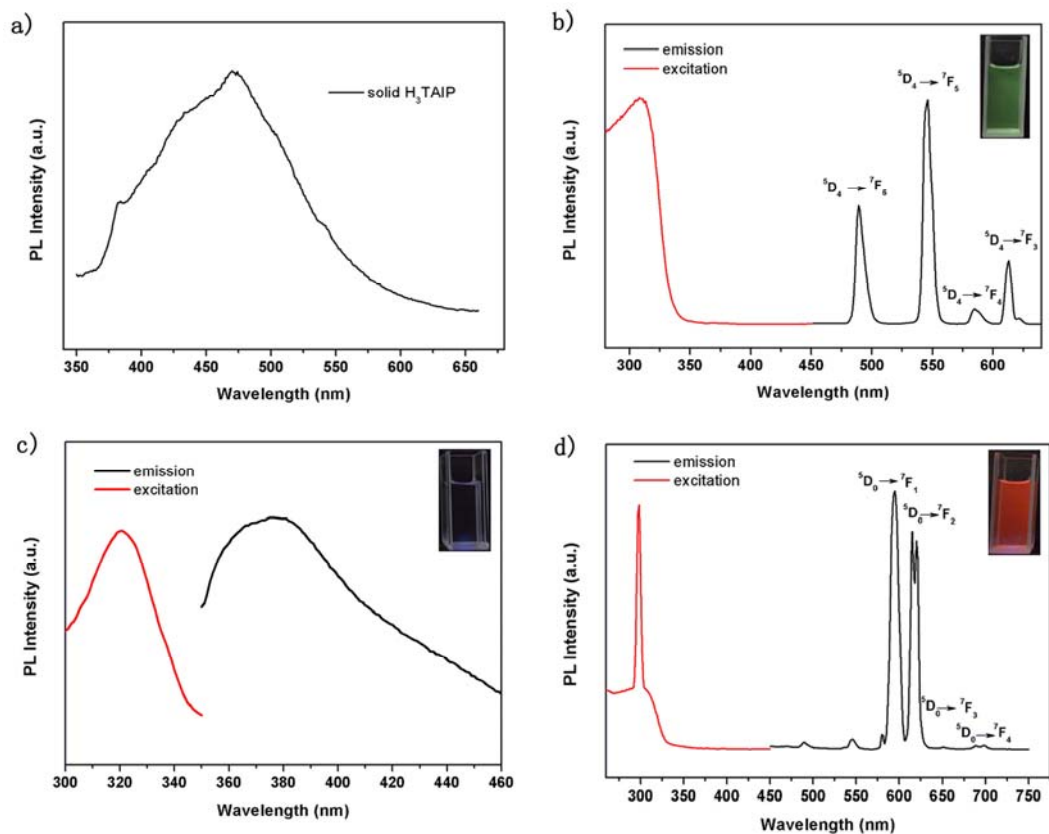

**Fig. S6** Luminescent spectra of H<sub>3</sub>TAIP in the solid state (a,  $\lambda_{\text{ex}} = 340$  nm). Excitation and emission spectra of **1'** (b,  $\lambda_{\text{ex}} = 305$  nm), **2'** (c,  $\lambda_{\text{ex}} = 321$  nm) and **3'** (d,  $\lambda_{\text{ex}} = 297$  nm) in ethanol suspensions (Inset: photographs of micrometer-sized **1'**, **2'** and **3'** under UV-light of 254 nm.).

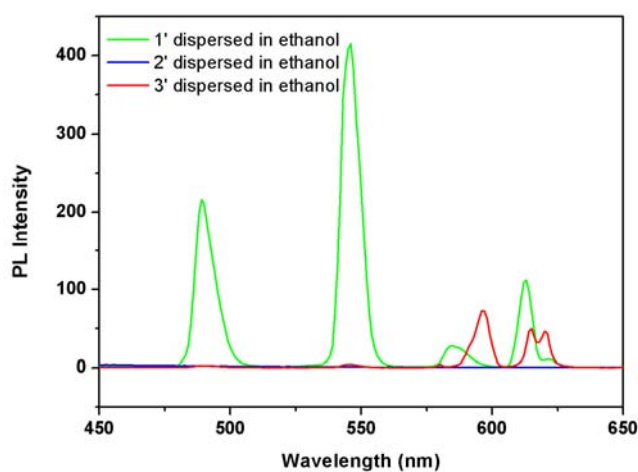

**Fig. S7** Comparison of emission intensities for micrometer-sized **1'**, **2'** and **3'** in ethanol suspensions (0.25 mg/mL).

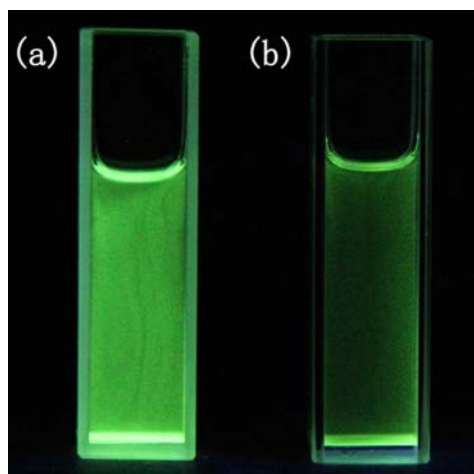

**Fig. S8** The photographs of micrometer-sized **1'** before (a) and after (b) adding  $\text{Fe}^{3+}$  under the UV-light of 254 nm.

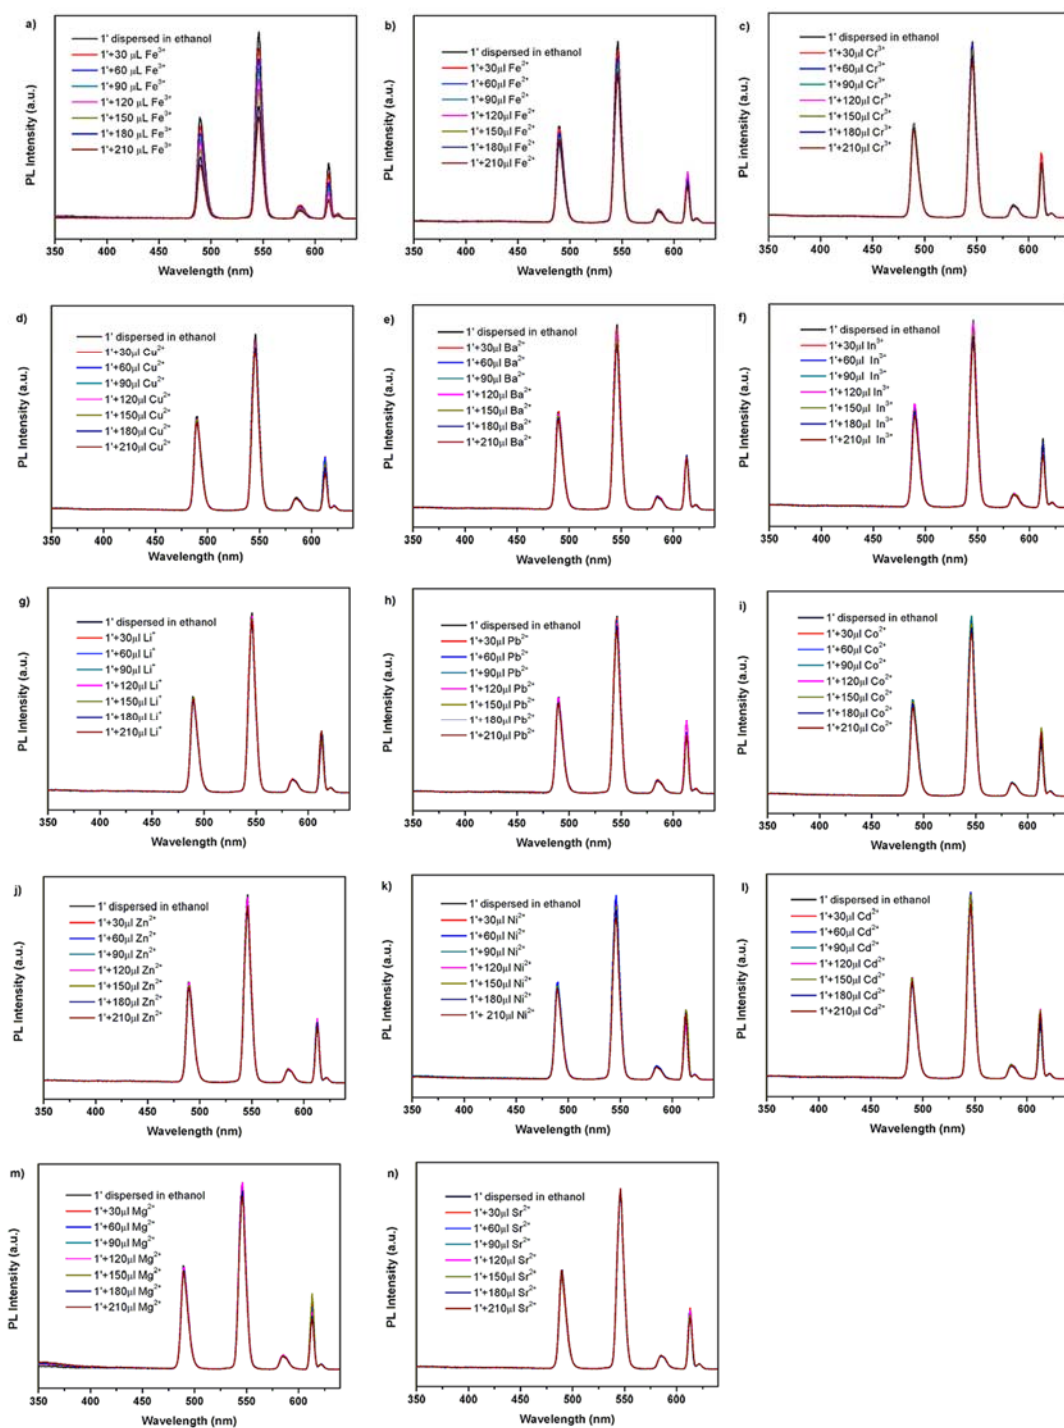

**Fig. S9** Fluorescent titrations of 0.5 mg **1'** dispersed in 2 mL ethanol solution with the addition of different volume of 0.001 M solution of a)  $\text{Fe}^{3+}$ , b)  $\text{Fe}^{2+}$ , c)  $\text{Cr}^{3+}$ , d)  $\text{Cu}^{2+}$  e)  $\text{Ba}^{2+}$ , f)  $\text{In}^{3+}$ , g)  $\text{Li}^+$ , h)  $\text{Pb}^{2+}$ , i)  $\text{Co}^{2+}$ , j)  $\text{Zn}^{2+}$ , k)  $\text{Ni}^{2+}$ , l)  $\text{Cd}^{2+}$ , m)  $\text{Mg}^{2+}$  and n)  $\text{Sr}^{2+}$  in ethanol. The fluorescent emission spectra were recorded from 350 nm to 640 nm upon the excitation at 305 nm. The slit width for excitation and emission is 1.5 nm and 3.0 nm, respectively.

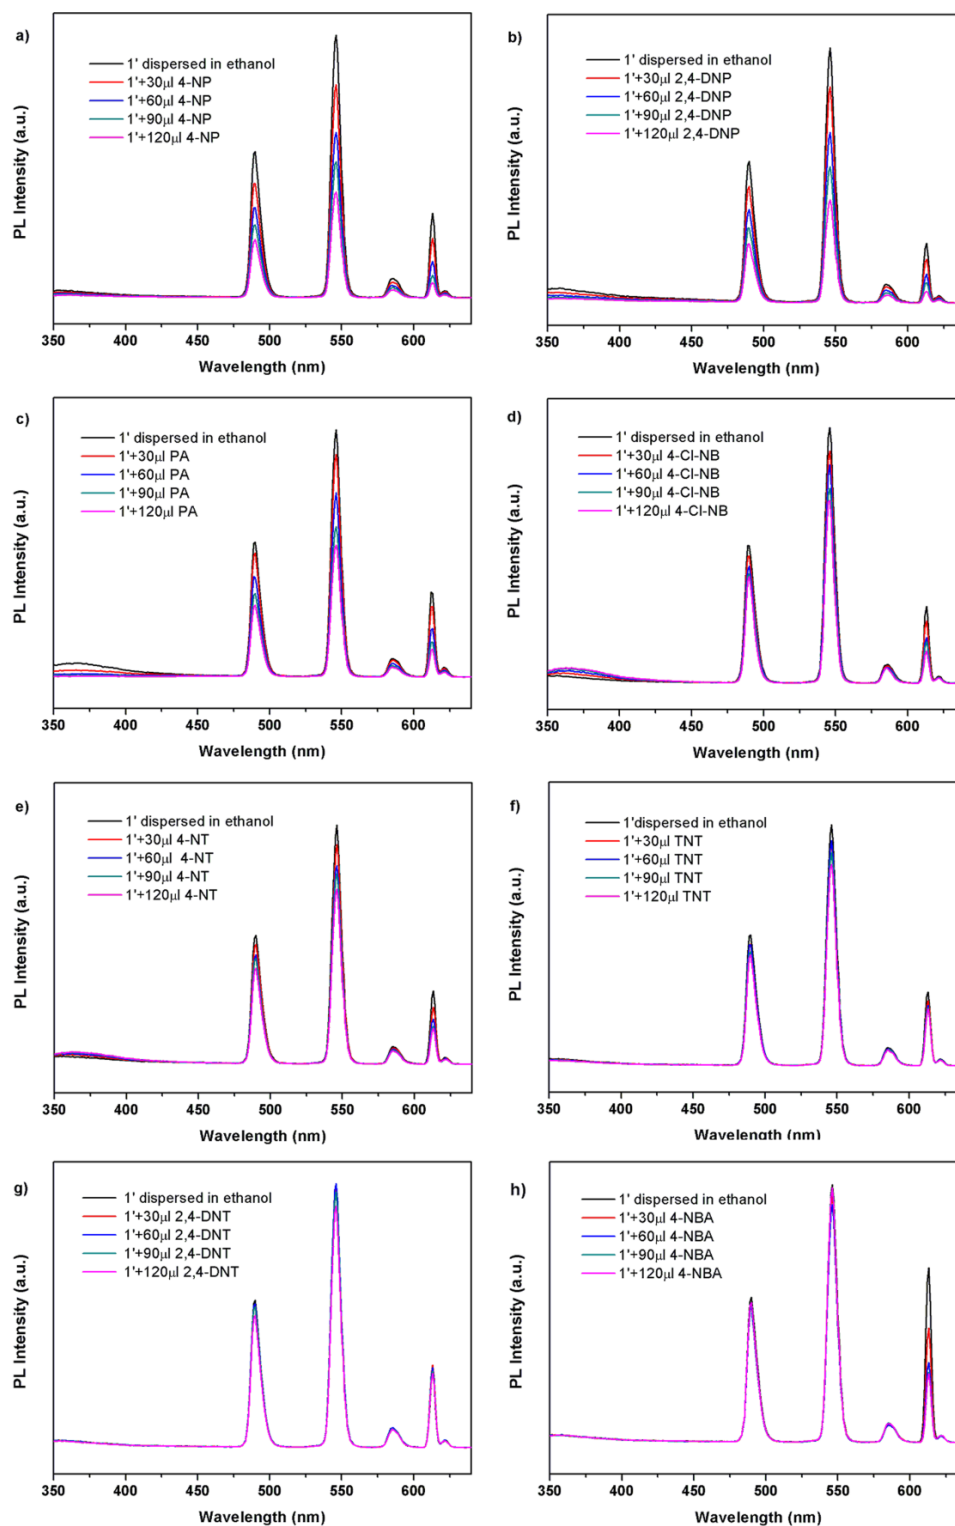

**Fig. S10** Fluorescent titrations of 0.5 mg **1'** dispersed in 2 mL ethanol solution with the addition of different volume of 0.001 M solution of a) 4-nitrophenol (4-NP), b) 2,4-dinitrophenol (2,4-DNP), c) Picric acid (PA), d) 4-chloronitrobenzene (4-Cl-NB) e) 4-nitrotoluene (4-NT), f) 2,4,6-trinitrotoluene (TNT), g) 2,4-dinitrotoluene (2,4-DNT), and h) 4-nitrobenzaldehyde (4-NBA) in ethanol. The fluorescent emission spectra were recorded from 350 nm to 640 nm upon the excitation at 305 nm. The slit width for excitation and emission is 1.5 nm and 3.0 nm, respectively.



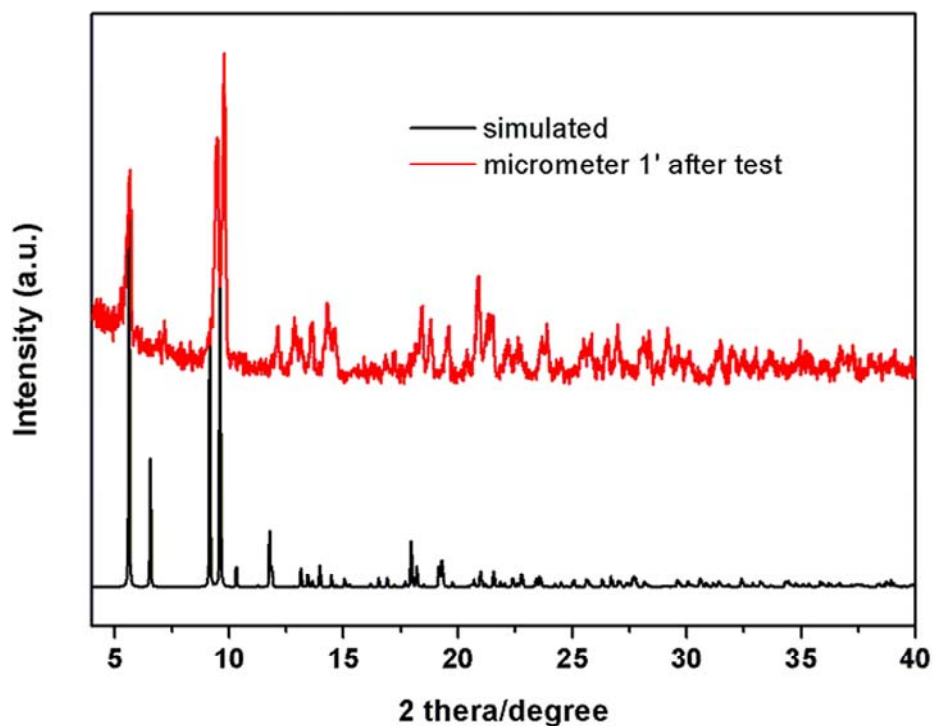

**Fig. S11** Powder X-ray diffraction patterns of simulated and micrometer-size phase **1'** after test.

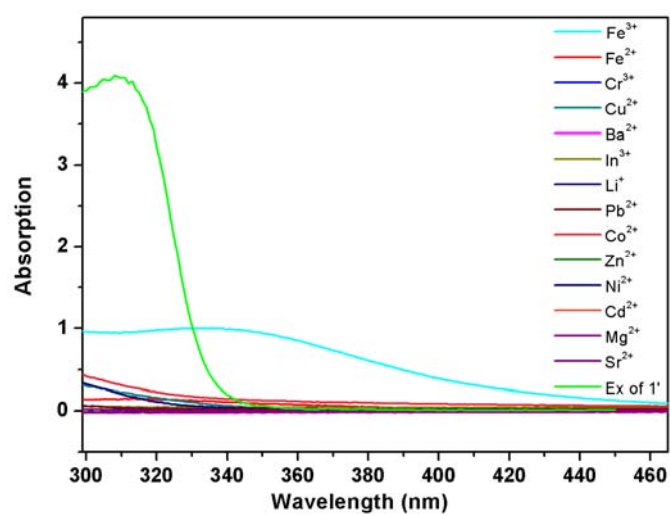

**Fig. S12** UV-Vis adsorption spectrum of  $M(\text{NO}_3)_x$  aqueous solution and the excitation spectrum of micrometer-size phase **1'**.

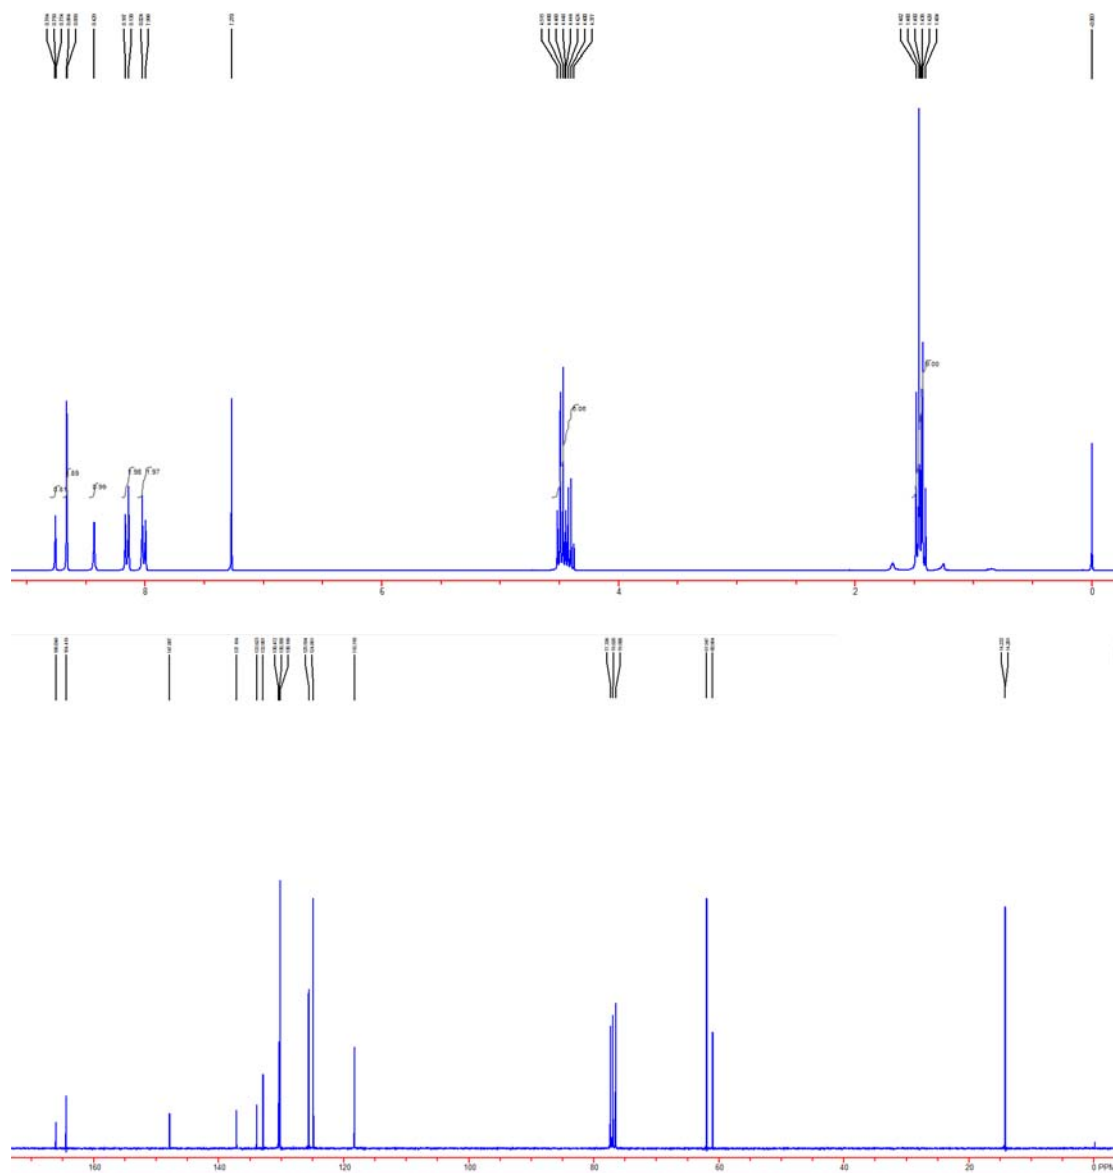

**Fig. S13** The  $^1\text{H}$  and  $^{13}\text{C}$  NMR spectra of **M3**

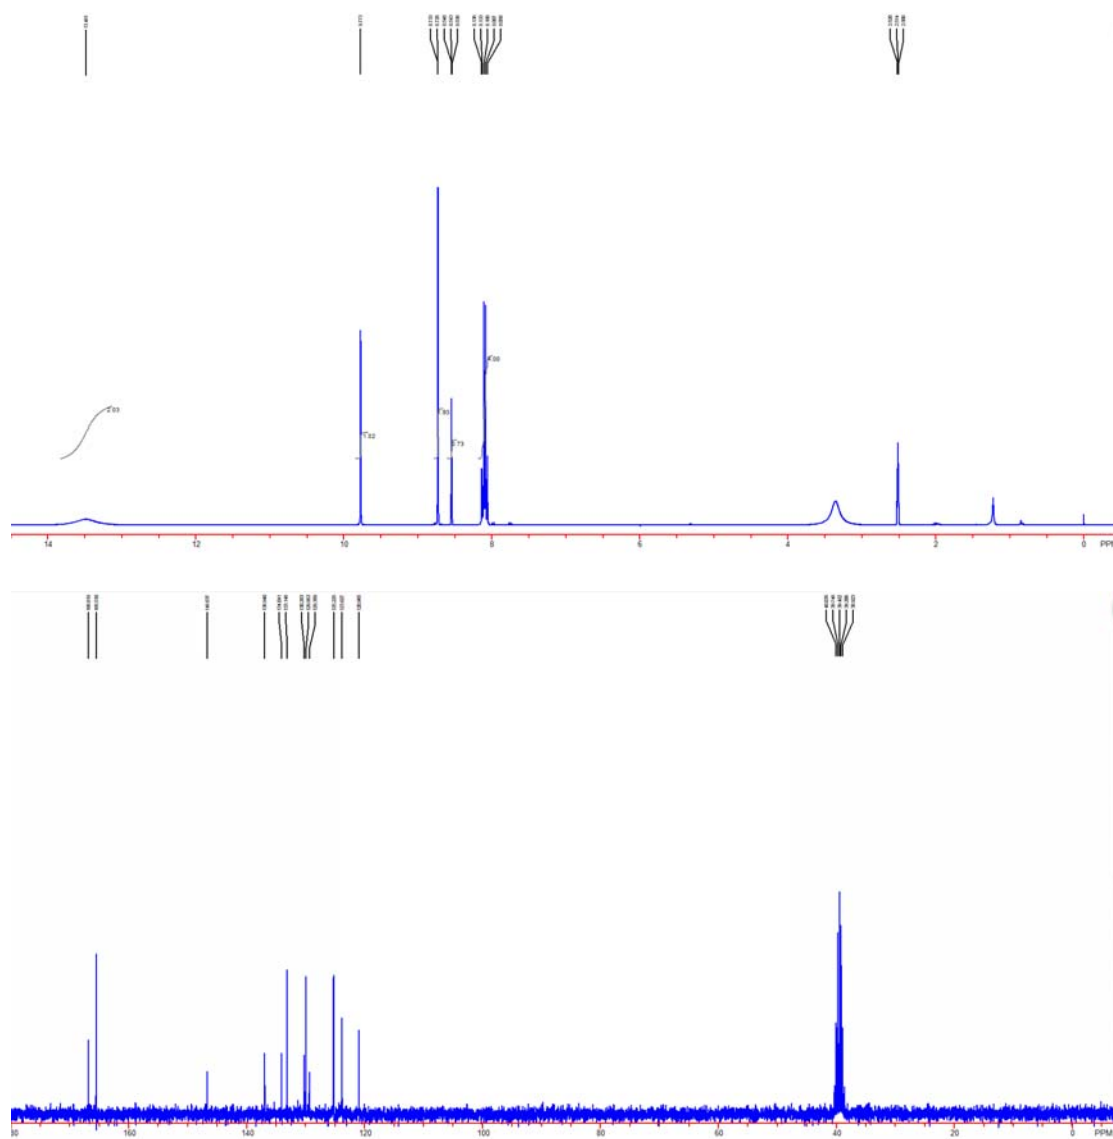

**Fig. S14** The <sup>1</sup>H and <sup>13</sup>C NMR spectra of H<sub>3</sub>TAIP.

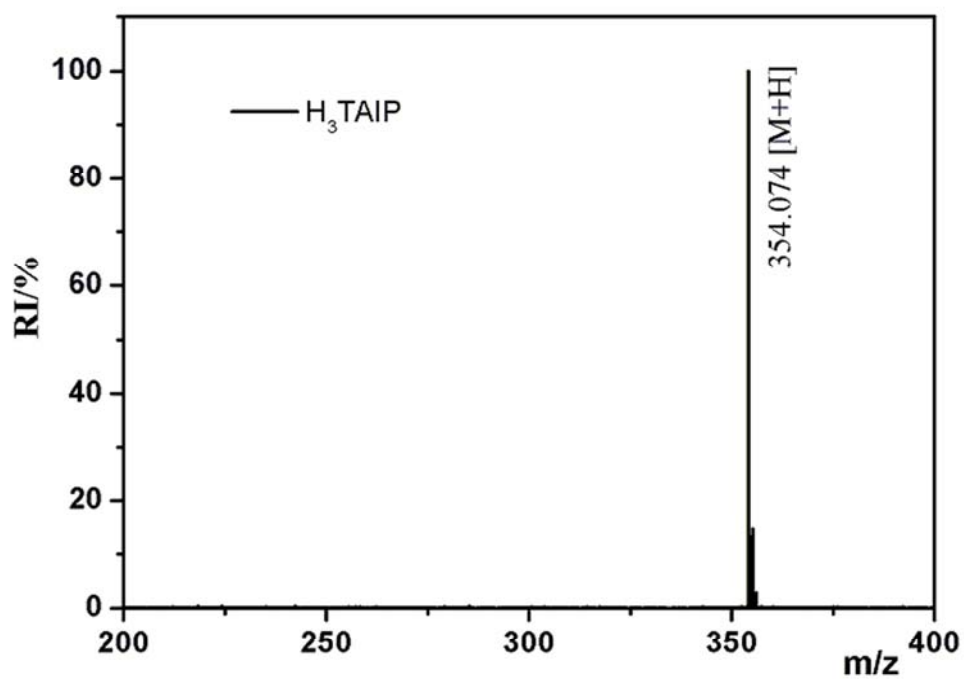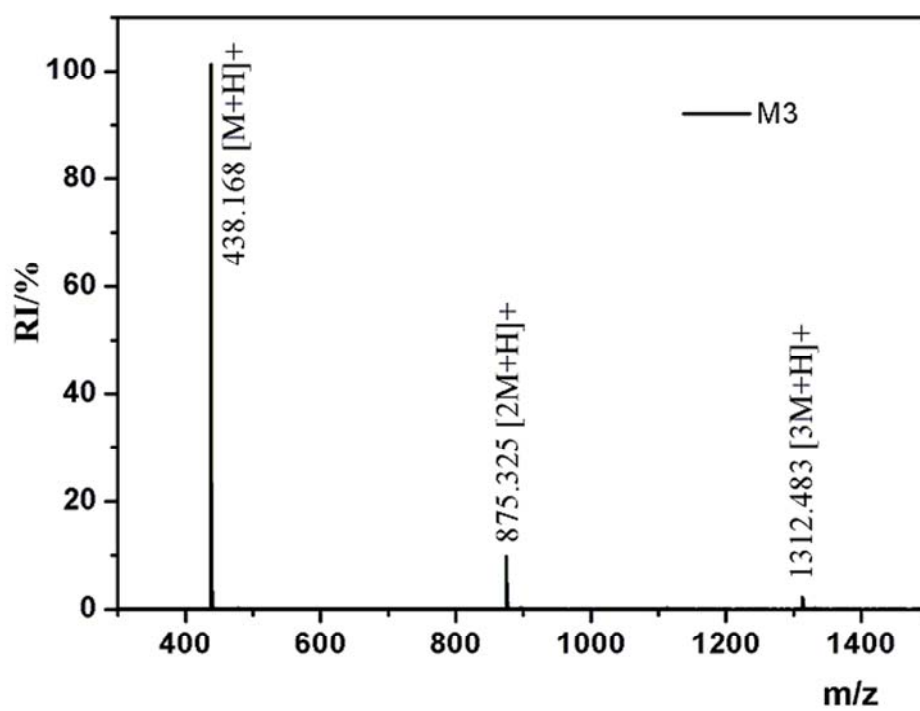

Fig. S15 MS of  $H_3TAIP$  and  $M3$ .

**Table S1** Crystal Data and Structure Refinement for **1**.<sup>a</sup>

---

|                                                             |                                                                                                     |
|-------------------------------------------------------------|-----------------------------------------------------------------------------------------------------|
| Empirical formula                                           | C <sub>23</sub> H <sub>22</sub> N <sub>5</sub> O <sub>8</sub> Tb                                    |
| Formula weight                                              | 655.20                                                                                              |
| Temperature                                                 | 296(2) K                                                                                            |
| Wavelength                                                  | 0.71073 Å                                                                                           |
| Crystal system, space group                                 | Monoclinic, <i>C2/c</i>                                                                             |
| Unit cell dimensions                                        | a = 31.6491(17) Å    α = 90°<br>b = 14.9143(9) Å    β = 96.4660(10)°<br>c = 13.2656(7) Å    γ = 90° |
| Volume                                                      | 6221.9(6) Å <sup>3</sup>                                                                            |
| Z                                                           | 8                                                                                                   |
| Absorption coefficient                                      | 2.317 mm <sup>-1</sup>                                                                              |
| <i>F</i> (000)                                              | 2416                                                                                                |
| Theta range for data collection                             | 1.51 to 28.30°                                                                                      |
| Limiting indices                                            | -38 ≤ h ≤ 42, -19 ≤ k ≤ 18, -16 ≤ l ≤ 17                                                            |
| Reflections collected / unique                              | 22674 / 7738                                                                                        |
| R <sub>int</sub>                                            | 0.0624                                                                                              |
| Completeness to theta = 28.30                               | 99.8%                                                                                               |
| Absorption correction                                       | Semi-empirical from equivalents                                                                     |
| Max. and min. Transmission                                  | 0.6805 and 0.6296                                                                                   |
| Refinement method                                           | Full-matrix least-squares on <i>F</i> <sup>2</sup>                                                  |
| Data / restraints / parameters                              | 7738 / 214 / 256                                                                                    |
| Goodness-of-fit on <i>F</i> <sup>2</sup>                    | 1.066                                                                                               |
| Final R indices [ <i>I</i> > 2 σ ( <i>I</i> )] <sup>b</sup> | R <sub>1</sub> = 0.0664, wR <sub>2</sub> = 0.1969                                                   |
| R indices (all data)                                        | R <sub>1</sub> = 0.0997, wR <sub>2</sub> = 0.2234                                                   |
| Largest diff. peak and hole                                 | 3.327 and -1.540 e.Å <sup>-3</sup>                                                                  |

---

**Table S2.** Bond lengths [ $\text{\AA}$ ] and angles [deg] for **1**.

| Bond lengths |          | Bond lengths |          |
|--------------|----------|--------------|----------|
| Tb(1)-O(7)#1 | 2.340(4) | Tb(1)-O(6)#2 | 2.362(4) |
| Tb(1)-O(3)#3 | 2.363(4) | Tb(1)-O(5)   | 2.379(8) |
| Tb(1)-O(2)   | 2.406(5) | Tb(1)-O(4)   | 2.410(7) |
| Tb(1)-O(8)#4 | 2.421(4) | Tb(1)-O(1)   | 2.481(5) |
| Tb(1)-O(7)#4 | 2.767(4) | O(7)-Tb(1)#6 | 2.767(4) |
| O(3)-Tb(1)#3 | 2.363(4) | O(8)-Tb(1)#6 | 2.421(4) |
| O(6)-Tb(1)#5 | 2.362(4) | O(7)-Tb(1)#1 | 2.340(4) |

| Bond angles         |            | Bond angles         |            |
|---------------------|------------|---------------------|------------|
| O(7)#1-Tb(1)-O(6)#2 | 79.92(13)  | O(7)#1-Tb(1)-O(3)#3 | 74.34(13)  |
| O(6)#2-Tb(1)-O(3)#3 | 131.35(12) | O(7)#1-Tb(1)-O(5)   | 79.9(3)    |
| O(6)#2-Tb(1)-O(5)   | 74.7(3)    | O(3)#3-Tb(1)-O(5)   | 137.4(3)   |
| O(7)#1-Tb(1)-O(2)   | 81.59(14)  | O(6)#2-Tb(1)-O(2)   | 143.75(15) |
| O(3)#3-Tb(1)-O(2)   | 71.48(15)  | O(5)-Tb(1)-O(2)     | 71.6(3)    |
| O(7)#1-Tb(1)-O(4)   | 146.9(2)   | O(6)#2-Tb(1)-O(4)   | 74.5(2)    |
| O(3)#3-Tb(1)-O(4)   | 138.7(2)   | O(5)-Tb(1)-O(4)     | 73.4(4)    |
| O(2)-Tb(1)-O(4)     | 107.4(2)   | O(7)#1-Tb(1)-O(8)#4 | 123.73(12) |
| O(6)#2-Tb(1)-O(8)#4 | 85.81(13)  | O(3)#3-Tb(1)-O(8)#4 | 75.71(13)  |
| O(5)-Tb(1)-O(8)#4   | 146.4(3)   | O(2)-Tb(1)-O(8)#4   | 130.22(15) |
| O(4)-Tb(1)-O(8)#4   | 75.3(2)    | O(7)#1-Tb(1)-O(1)   | 131.28(14) |
| O(6)#2-Tb(1)-O(1)   | 146.13(14) | O(3)#3-Tb(1)-O(1)   | 77.30(14)  |
| O(5)-Tb(1)-O(1)     | 95.9(3)    | O(2)-Tb(1)-O(1)     | 51.92(15)  |
| O(4)-Tb(1)-O(1)     | 71.7(3)    | O(8)#4-Tb(1)-O(1)   | 85.23(14)  |
| O(7)#1-Tb(1)-O(7)#4 | 75.39(13)  | O(6)#2-Tb(1)-O(7)#4 | 66.25(12)  |
| O(3)#3-Tb(1)-O(7)#4 | 67.64(12)  | O(5)-Tb(1)-O(7)#4   | 136.5(3)   |
| O(2)-Tb(1)-O(7)#4   | 137.06(14) | O(4)-Tb(1)-O(7)#4   | 111.7(2)   |
| O(8)#4-Tb(1)-O(7)#4 | 49.29(11)  | O(1)-Tb(1)-O(7)#4   | 127.19(14) |

**Table S3.** Crystal Data and Structure Refinement for **2**.<sup>a</sup>

---

|                                            |                                                                                                     |
|--------------------------------------------|-----------------------------------------------------------------------------------------------------|
| Empirical formula                          | C <sub>49</sub> H <sub>51</sub> La <sub>2</sub> N <sub>11</sub> O <sub>17</sub>                     |
| Formula weight                             | 1343.42                                                                                             |
| Temperature                                | 296(2) K                                                                                            |
| Wavelength                                 | 0.71073 Å                                                                                           |
| Crystal system, space group                | Monoclinic, C2/c                                                                                    |
| Unit cell dimensions                       | a = 32.118(3) Å      α = 90°<br>b = 15.2133(17) Å    β = 95.256(2)°<br>c = 13.1789(14) Å    γ = 90° |
| Volume                                     | 6412.4(12) Å <sup>3</sup>                                                                           |
| Z                                          | 4                                                                                                   |
| Absorption coefficient                     | 1.381 mm <sup>-1</sup>                                                                              |
| F (000)                                    | 2484                                                                                                |
| Theta range for data collection            | 1.48 to 28.34°                                                                                      |
| Limiting indices                           | -42 ≤ h ≤ 36, -18 ≤ k ≤ 20, -13 ≤ l ≤ 17                                                            |
| Reflections collected / unique             | 23110 / 7987                                                                                        |
| R <sub>int</sub>                           | 0.0628                                                                                              |
| Completeness to theta = 28.34              | 99.8%                                                                                               |
| Absorption correction                      | Semi-empirical from equivalents                                                                     |
| Max. and min. Transmission                 | 0.7892 and 0.7603                                                                                   |
| Refinement method                          | Full-matrix least-squares on F <sup>2</sup>                                                         |
| Data / restraints / parameters             | 7987 / 268 / 412                                                                                    |
| Goodness-of-fit on F <sup>2</sup>          | 1.007                                                                                               |
| Final R indices [I > 2 σ (I)] <sup>b</sup> | R <sub>1</sub> = 0.0582, wR <sub>2</sub> = 0.1634                                                   |
| R indices (all data)                       | R <sub>1</sub> = 0.0947, wR <sub>2</sub> = 0.1886                                                   |
| Largest diff. peak and hole                | 1.739 and -1.781 e.Å <sup>-3</sup>                                                                  |

---

**Table S4.** Bond lengths [ $\text{\AA}$ ] and angles [deg] for **2**.

| Bond lengths |          | Bond lengths |          |
|--------------|----------|--------------|----------|
| La(1)-O(3)#1 | 2.482(4) | La(1)-O(6)#2 | 2.491(5) |
| La(1)-O(5)#3 | 2.497(4) | La(1)-O(7)   | 2.517(6) |
| La(1)-O(8)   | 2.524(7) | La(1)-O(1)   | 2.534(5) |
| La(1)-O(4)#4 | 2.538(5) | La(1)-O(2)   | 2.593(5) |
| La(1)-O(3)#4 | 2.831(4) | O(3)-La(1)#1 | 2.482(4) |
| O(3)-La(1)#6 | 2.831(4) | O(4)-La(1)#6 | 2.538(5) |
| O(5)-La(1)#3 | 2.497(4) | O(6)-La(1)#7 | 2.491(5) |

| Bond angles         |            | Bond angles         |            |
|---------------------|------------|---------------------|------------|
| O(3)#1-La(1)-O(6)#2 | 78.56(16)  | O(3)#1-La(1)-O(5)#3 | 73.68(16)  |
| O(6)#2-La(1)-O(5)#3 | 130.35(16) | O(3)#1-La(1)-O(7)   | 148.1(2)   |
| O(6)#2-La(1)-O(7)   | 75.20(19)  | O(5)#3-La(1)-O(7)   | 137.9(2)   |
| O(3)#1-La(1)-O(8)   | 80.4(2)    | O(6)#2-La(1)-O(8)   | 72.6(2)    |
| O(5)#3-La(1)-O(8)   | 138.8(2)   | O(7)-La(1)-O(8)     | 74.7(3)    |
| O(3)#1-La(1)-O(1)   | 78.73(16)  | O(6)#2-La(1)-O(1)   | 141.37(18) |
| O(5)#3-La(1)-O(1)   | 70.81(17)  | O(7)-La(1)-O(1)     | 111.9(2)   |
| O(8)-La(1)-O(1)     | 73.1(2)    | O(3)#1-La(1)-O(4)#4 | 122.45(14) |
| O(6)#2-La(1)-O(4)#4 | 87.71(18)  | O(5)#3-La(1)-O(4)#4 | 74.24(16)  |
| O(7)-La(1)-O(4)#4   | 74.4(2)    | O(8)-La(1)-O(4)#4   | 146.7(2)   |
| O(1)-La(1)-O(4)#4   | 130.91(17) | O(3)#1-La(1)-O(2)   | 129.21(15) |
| O(6)#2-La(1)-O(2)   | 146.15(18) | O(5)#3-La(1)-O(2)   | 81.07(19)  |
| O(7)-La(1)-O(2)     | 71.8(2)    | O(8)-La(1)-O(2)     | 91.6(2)    |
| O(1)-La(1)-O(2)     | 51.27(16)  | O(4)#4-La(1)-O(2)   | 90.41(17)  |
| O(3)#1-La(1)-O(3)#4 | 76.02(14)  | O(6)#2-La(1)-O(3)#4 | 66.14(15)  |
| O(5)#3-La(1)-O(3)#4 | 67.65(14)  | O(7)-La(1)-O(3)#4   | 108.69(19) |
| O(8)-La(1)-O(3)#4   | 135.5(2)   | O(1)-La(1)-O(3)#4   | 135.86(17) |
| O(4)#4-La(1)-O(3)#4 | 47.79(13)  | O(2)-La(1)-O(3)#4   | 132.33(18) |



**Table S5.** Bond lengths [Å] and angles [deg] for **3**.<sup>a</sup>

---

|                                            |                                                                                              |
|--------------------------------------------|----------------------------------------------------------------------------------------------|
| Empirical formula                          | C <sub>23</sub> H <sub>22</sub> Eu N <sub>5</sub> O <sub>87</sub>                            |
| Formula weight                             | 648.24                                                                                       |
| Temperature                                | 293(2) K                                                                                     |
| Wavelength                                 | 0.71073 Å                                                                                    |
| Crystal system, space group                | Monoclinic, C2/c                                                                             |
| Unit cell dimensions                       | a = 31.810(6) Å    α = 90°<br>b = 14.993(3) Å    β = 96.01(3)°<br>c = 13.220(3) Å    γ = 90° |
| Volume                                     | 6271(2) Å <sup>3</sup>                                                                       |
| Z                                          | 8                                                                                            |
| Absorption coefficient                     | 2.044 mm <sup>-1</sup>                                                                       |
| F (000)                                    | 2400                                                                                         |
| Theta range for data collection            | 3.01 to 27.48°                                                                               |
| Limiting indices                           | -41 ≤ h ≤ 41, -19 ≤ k ≤ 18, -15 ≤ l ≤ 17                                                     |
| Reflections collected / unique             | 29600 / 7152                                                                                 |
| R <sub>int</sub>                           | 0.0828                                                                                       |
| Completeness to theta = 27.48              | 99.4 %                                                                                       |
| Absorption correction                      | Semi-empirical from equivalents                                                              |
| Max. and min. Transmission                 | 0.6974 and 0.6507                                                                            |
| Refinement method                          | Full-matrix least-squares on F <sup>2</sup>                                                  |
| Data / restraints / parameters             | 7152 / 224 / 289                                                                             |
| Goodness-of-fit on F <sup>2</sup>          | 1.092                                                                                        |
| Final R indices [I > 2 σ (I)] <sup>b</sup> | R <sub>1</sub> = 0.0596, wR <sub>2</sub> = 0.1638                                            |
| R indices (all data)                       | R <sub>1</sub> = 0.0842, wR <sub>2</sub> = 0.1852                                            |
| Largest diff. peak and hole                | 1.875 and -1.245 e.Å <sup>-3</sup>                                                           |

---

**Table S6.** Bond lengths [Å] and angles [deg] for **3**.

| Bond lengths |          | Bond lengths |          |
|--------------|----------|--------------|----------|
| Eu(1)-O(1)#3 | 2.379(2) | Eu(1)-O(6)   | 2.397(3) |
| Eu(1)-O(5)   | 2.406(3) | Eu(1)-O(7)   | 2.422(3) |
| Eu(1)-O(8)   | 2.429(4) | Eu(1)-O(2)   | 2.437(3) |
| Eu(1)-O(4)   | 2.443(3) | Eu(1)-O(3)   | 2.514(3) |
| Eu(1)-O(1)   | 2.774(3) | O(1)-Eu(1)#3 | 2.379(2) |

| Bond angles       |            | Bond angles       |            |
|-------------------|------------|-------------------|------------|
| O(6)-Eu(1)-O(5)   | 131.49(9)  | O(1)#3-Eu(1)-O(7) | 146.04(12) |
| O(6)-Eu(1)-O(7)   | 73.94(12)  | O(5)-Eu(1)-O(7)   | 139.24(12) |
| O(1)#3-Eu(1)-O(8) | 78.93(14)  | O(6)-Eu(1)-O(8)   | 72.52(13)  |
| O(5)-Eu(1)-O(8)   | 138.53(14) | O(7)-Eu(1)-O(8)   | 72.92(16)  |
| O(1)#3-Eu(1)-O(2) | 124.19(9)  | O(6)-Eu(1)-O(2)   | 86.25(10)  |
| O(5)-Eu(1)-O(2)   | 75.47(9)   | O(7)-Eu(1)-O(2)   | 75.60(12)  |
| O(8)-Eu(1)-O(2)   | 145.78(14) | O(1)#3-Eu(1)-O(4) | 80.50(10)  |
| O(6)-Eu(1)-O(4)   | 142.75(11) | O(5)-Eu(1)-O(4)   | 71.69(10)  |
| O(7)-Eu(1)-O(4)   | 108.16(12) | O(8)-Eu(1)-O(4)   | 72.84(14)  |
| O(2)-Eu(1)-O(4)   | 130.84(11) | O(1)#3-Eu(1)-O(3) | 130.82(9)  |
| O(6)-Eu(1)-O(3)   | 146.05(10) | O(5)-Eu(1)-O(3)   | 77.75(11)  |
| O(7)-Eu(1)-O(3)   | 72.11(12)  | O(8)-Eu(1)-O(3)   | 96.83(14)  |
| O(2)-Eu(1)-O(3)   | 85.89(10)  | O(4)-Eu(1)-O(3)   | 52.26(10)  |
| O(1)#3-Eu(1)-O(1) | 75.99(9)   | O(6)-Eu(1)-O(1)   | 66.10(9)   |
| O(5)-Eu(1)-O(1)   | 68.01(9)   | O(7)-Eu(1)-O(1)   | 111.28(10) |
| O(8)-Eu(1)-O(1)   | 134.48(13) | O(2)-Eu(1)-O(1)   | 49.25(8)   |
| O(4)-Eu(1)-O(1)   | 137.32(9)  | O(3)-Eu(1)-O(1)   | 128.21(10) |
| O(1)#3-Eu(1)-O(5) | 74.70(9)   |                   |            |

<sup>a</sup>Data based on *PLATON/SQUEEZE* mode.

$${}^b R_1 = \frac{\sum ||F_o| - |F_c||}{\sum |F_o|}, \quad wR_2 = \left[ \frac{\sum [w (F_o^2 - F_c^2)^2]}{\sum [w (F_o^2)^2]} \right]^{1/2}.$$
